# Supplementary material
Source: publisher figshare collection journal article supplement (https://acs.figshare.com/ndownloader/files/9071254)
Supplement: Supplementary file 1 [file 9071254]

## Supporting Information:

### Size-tunable and Crystalline BODIPY Nanorods for Bioimaging

*Jianxu Zhang,<sup>†‡</sup> Lei Wang,<sup>†</sup> and Zhigang Xie<sup>\*†</sup>*

<sup>†</sup> State Key Laboratory of Polymer Physics and Chemistry, Changchun Institute of Applied Chemistry, Chinese Academy of Sciences, 5625 Renmin Street, Changchun, Jilin 130022, P. R. China

<sup>‡</sup> University of Chinese Academy of Sciences, No.19A Yuquan Road, Beijing 100049, P. R. China

## 1. Experimental Procedures

**Materials.** BDP and its derivatives were prepared following the protocol has been reported. <sup>[S1]</sup> Milli-Q water was collected from a Milli-Q system (Millipore, USA). Chemicals and reagents were acquired from commercial sources without further purification.

**The instruments for characterizations.** The size distribution was performed using a Zeta-sizer Nano-ZS (Malvern Instruments Ltd.). Transmission electron microscopy (TEM) images were taken by a JEOL JEM-1011 (Japan) at the accelerating voltage of 100 kV. UV–vis absorption spectra were recorded via a Shimadzu UV-2450 UV–vis scanning spectrophotometer. Fluorescence emission spectra were conducted on a LS-55 fluorophotometer. The cell confocal images were obtained using Zeiss confocal laser microscope (ZEISS LSM 700). PXRD was performed by a Rigaku D/MAX2550 diffractometer using CuK $\alpha$  radiation, 40 kV, 200 mA with scanning rate of 0.4 ° min<sup>-1</sup>. High-resolution TEM (HRTEM) images were recorded with a FEI-TECNAI G2 transmission electron microscope operating at 200 kV. Fluorescence quantum efficiency was obtained on a Hamamatsu Absolute PL Quantum Yield Measurement System C9920-02.

**Preparation of BDP-NRs.** BDP-NRs were prepared using a reprecipitation method. In a typical procedure, the BDP solution (400  $\mu$ L) was quickly dropwise dispersed into 4 mL of milli-Q water with vigorous stirring at room temperature for 30 min. Then the solution was dialyzed against Milli-Q water for 24 h, the cutoff molecular weight of the dialysis bags is 3500.

***Monitoring of the self-assembly of BDP.*** the BDP solution (400  $\mu\text{L}$ ) was quickly dropwise dispersed into 4 mL of milli-Q water with vigorous stirring at room temperature. Then we took out 10  $\mu\text{L}$  mixing solution at different time points (2.5, 5, 10, 15, 20 and 25 min), and diluted the solution using 90  $\mu\text{L}$  of milli-Q water to maintain the status of the particles in mixing solution. Then we used TEM to observe the results.

***Size tunability of BDP-NRs.*** Different volume of the BDP solution from 200  $\mu\text{L}$  to 800  $\mu\text{L}$  were quickly dropwise dispersed into 4 mL of milli-Q water with vigorous stirring at room temperature for 30 min, respectively. Then the solutions were dialyzed against Milli-Q water for 24 h, the cutoff molecular weight of the dialysis bags is 3500.

***Measurement of fluorescence quantum yield.*** We firstly detected the concentration of BDP in BDP-NRs by absorbance curve. Then we prepared BDP acetone solution with the same concentration. Fluorescence quantum efficiency was obtained on a Hamamatsu Absolute PL Quantum Yield Measurement System C9920-02.

***Cell culture.*** HeLa cells were propagated to confluence in DMEM medium supplemented with 100 U/mL penicillin, 100  $\mu\text{g/mL}$  streptomycin and 10% FBS, and maintained at 37°C in a humidified atmosphere of 5%  $\text{CO}_2$  for further cell experiments.

***Biocompatibility of BDP and BDP-NRs in vitro by MTT Assay.*** Cells harvested in a logarithmic growth phase were seeded in 96-well plates at a density of  $8 \times 10^3$  cells per well and incubated in DMEM for 24 h. The medium was then replaced by 200  $\mu\text{L}$

of DMEM containing predetermined concentrations of BDP and BDP-NRs, respectively, and then incubated for 24 h, followed by MTT assays to measure the live cells. Cell viabilities were determined by reading the absorbance of the plates at 490 nm with a microplate reader. The cells incubated with DMEM were used as the control. The cell viability (%) =  $A_{\text{sample}} / A_{\text{control}} \times 100\%$ . We also detected the cytotoxicity of BDP-NRs with HeLa cells for different culture time and concentration.

***Cellular uptake and tracking in vitro.*** The cellular uptake measurement was investigated by CLSM. Cells harvested in a logarithmic growth phase were seeded in 6-well plates at a density of  $2.5 \times 10^5$  cells/well and incubated in DMEM for 24 h. The medium was then replaced by 2 mL of DMEM containing BDP or BDP-NRs and incubated for different hours at 37°C, and further washed using PBS for 3 times. For the CLSM, the cells were fixed with 4% of paraformaldehyde solution for 10 min. After that, DAPI was added for another 5 min incubation to locate the nucleus. Later, the cells were washed with PBS and observed using confocal laser scanning microscopy (CLSM, Zeiss LSM 700).

## 2. Figures and Tables

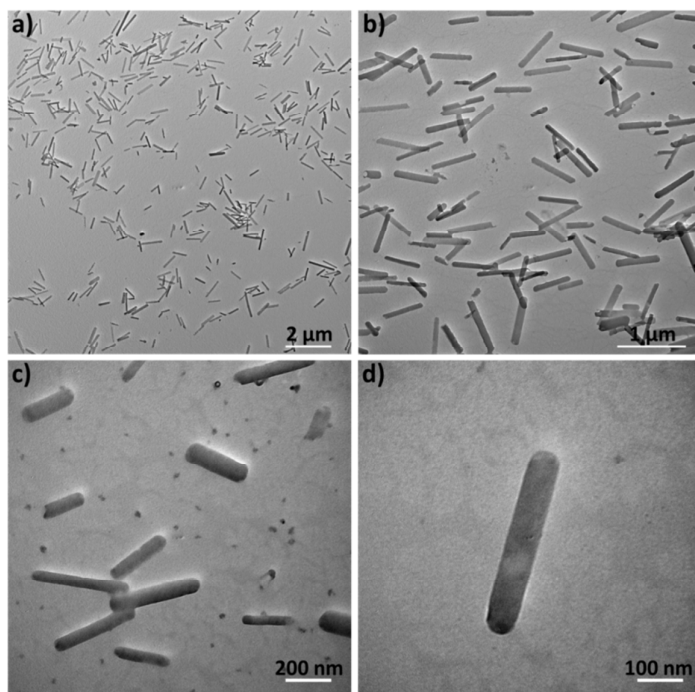

**Figure S1.** TEM pictures of BDP-NRs under different magnification. a) 10000 X; b) 30000 X; c) 100000 X; d) 200000 X.

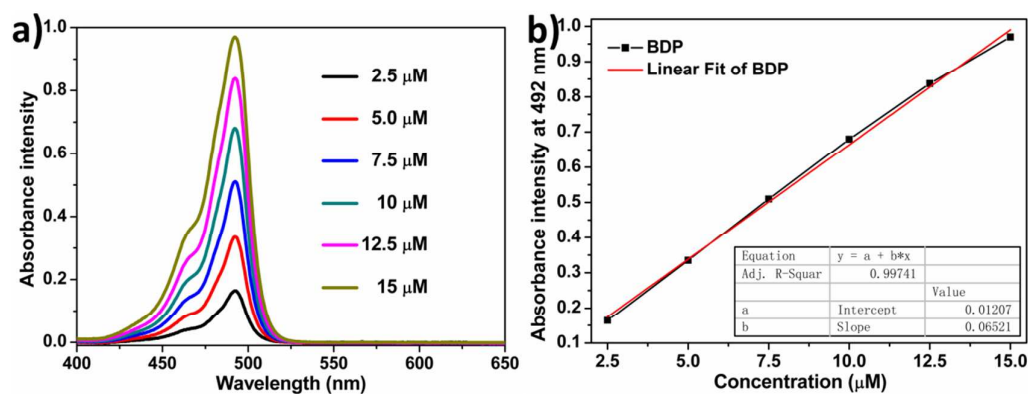

**Figure S2.** a) and b) Standard absorbance curve of BDP. (The absorbance of BDP molecules at 492 nm (from a mixture of acetone and water (v/v = 4:1)) as a function of BDP concentration.)

**Table S1.** Quantum yield and fluorescence lifetime of BDP and BDP-NRs, respectively.

|                     | Quantum yield ( $\phi$ ) | Fluorescence lifetime (ns) |
|---------------------|--------------------------|----------------------------|
| Free BDP in acetone | 85.3%                    | 6.28                       |
| BDP-NRs in water    | 5.5%                     | 3.77                       |

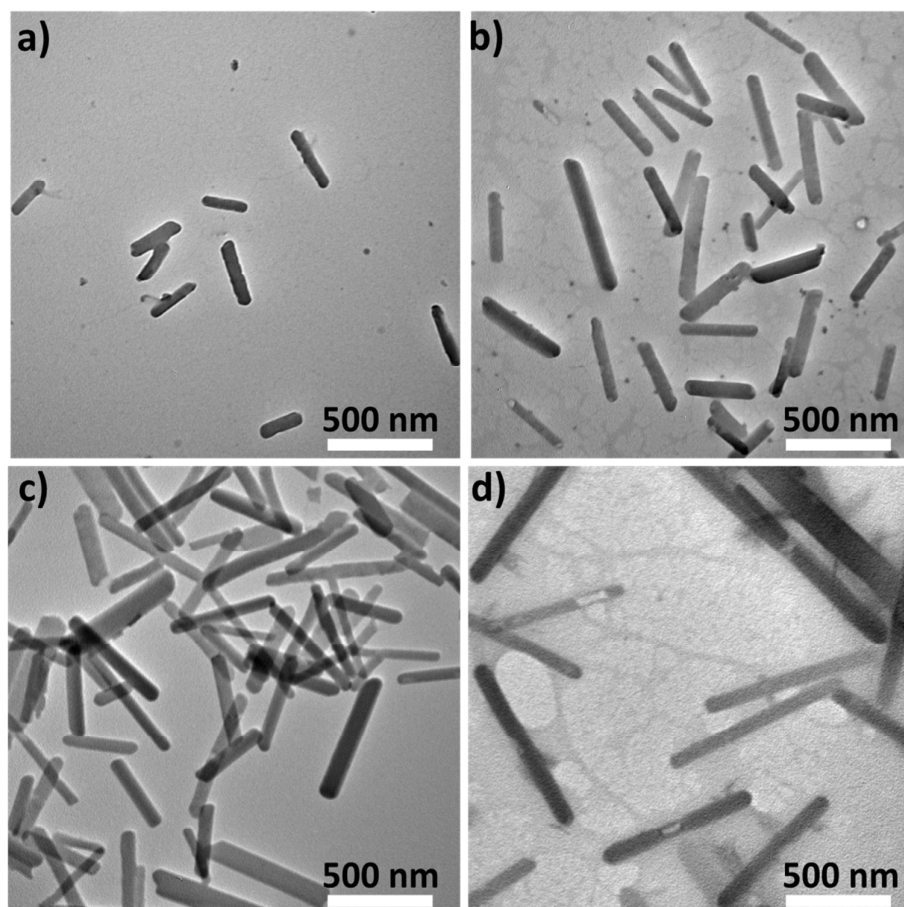

**Figure S3.** TEM pictures of BDP-NRs with different sizes. a) ~260 nm; b) ~420 nm; c) ~560 nm; d) ~920 nm. Scale bars: 500 nm.

**Table S2.** The relevant parameters of BDP-NRs made by adjusting the volume of BDP.

| Volume of BDP (500 $\mu$ M in acetone)<br>( $\mu$ L) | Length of BDP-NRs<br>(nm) | Diameter of BDP-NRs<br>(nm) | Aspect ratio |
|------------------------------------------------------|---------------------------|-----------------------------|--------------|
| 200                                                  | 267.4 $\pm$ 34.7          | 58.7 $\pm$ 7.2              | $\sim$ 4:1   |
| 400                                                  | 423.8 $\pm$ 40.5          | 61.3 $\pm$ 4.3              | $\sim$ 7:1   |
| 600                                                  | 566.5 $\pm$ 28.6          | 56.2 $\pm$ 9.1              | $\sim$ 9.5:1 |
| 800                                                  | 925.1 $\pm$ 51.4          | 63.9 $\pm$ 6.6              | $\sim$ 15:1  |

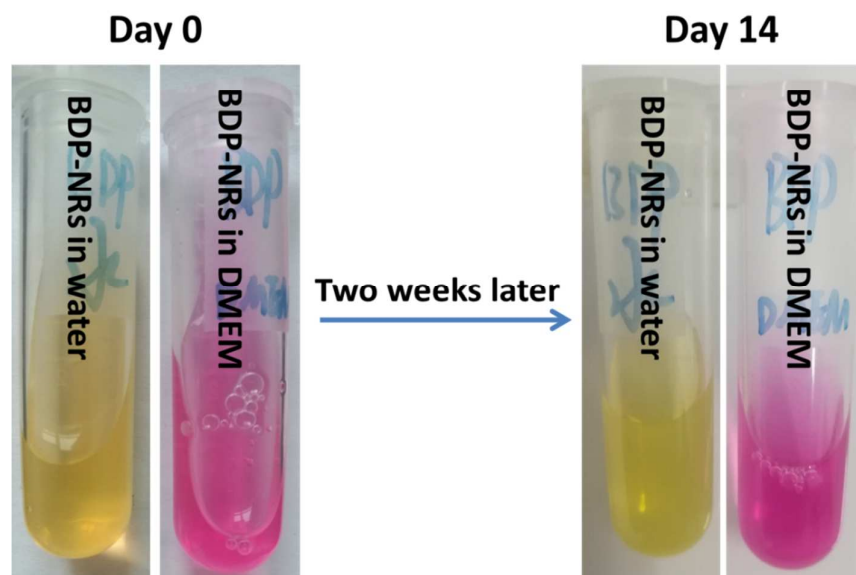

**Figure S4.** Photographs of BDP-NRs in different conditions which were freshly made and two weeks after preparation, respectively.

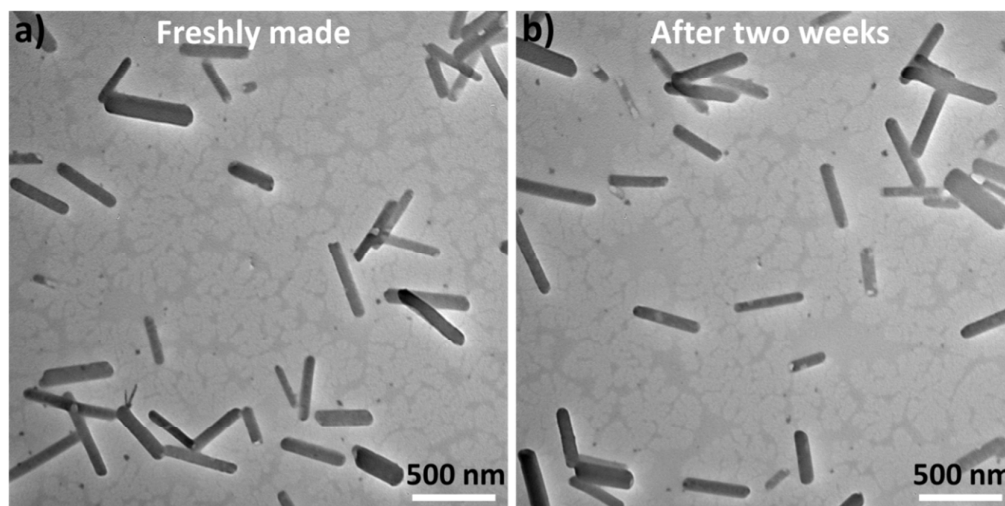

**Figure S5.** TEM images of BDP-NRs which were freshly made and two weeks after preparation. Scale bar: 500 nm.

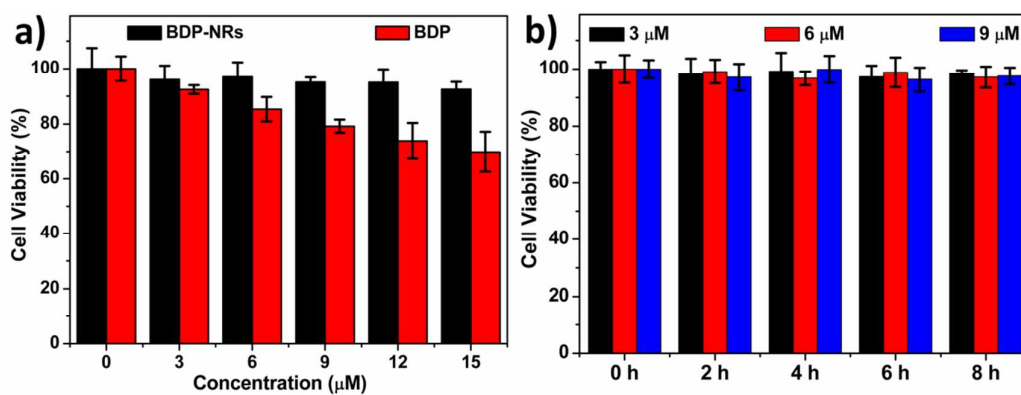

**Figure S6.** a) Relative cell viabilities of HeLa cells incubated with different concentrations of BDP-NRs and BDP for 24 h, respectively. b) Relative cell viabilities of HeLa cells incubated with different concentrations of BDP-NRs for different hours, respectively.



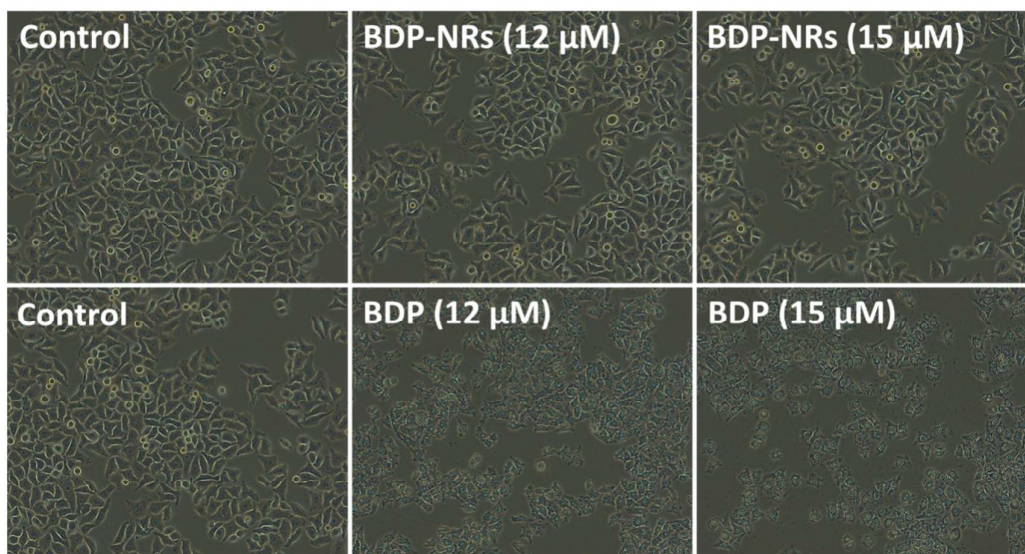

**Figure S7.** The morphology change of HeLa cells incubated with BDP or BDP-NRs of different concentration of BDP for 24 h at 37 °C.

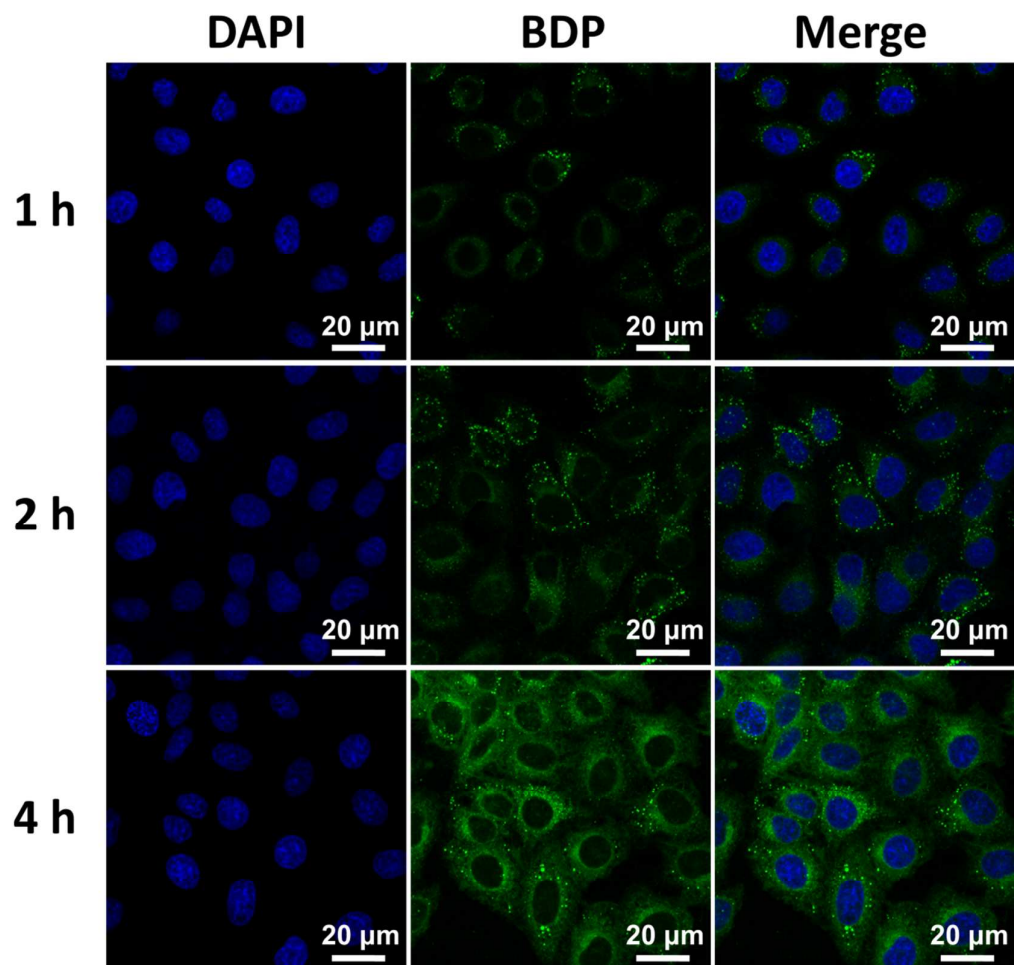

**Figure S8.** CLSM images showing changes in the signal of BDP in HeLa cells treated with BDP-NRs with the same BDP concentration of 9  $\mu\text{M}$  for 1 h (upper), 2 h (middle) and 4 h (lower) at 37  $^{\circ}\text{C}$ . Scale bars: 20  $\mu\text{m}$ .

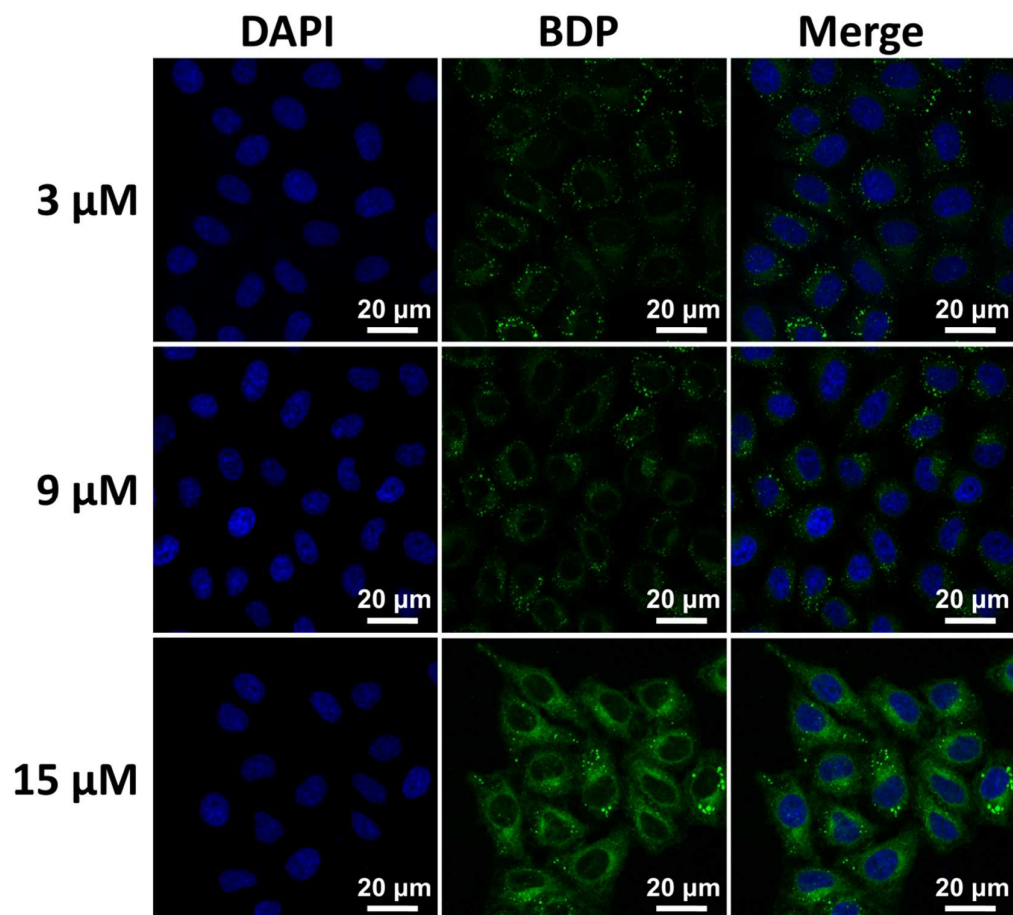

**Figure S9.** a) CLSM images showing changes in the signal of BDP in HeLa cells treated with BDP-NRs with the BDP concentration of 3  $\mu\text{M}$  (upper), 9  $\mu\text{M}$  (middle), 15  $\mu\text{M}$  (lower) for 2 h at 37  $^{\circ}\text{C}$ . Scale bars: 20  $\mu\text{m}$ .

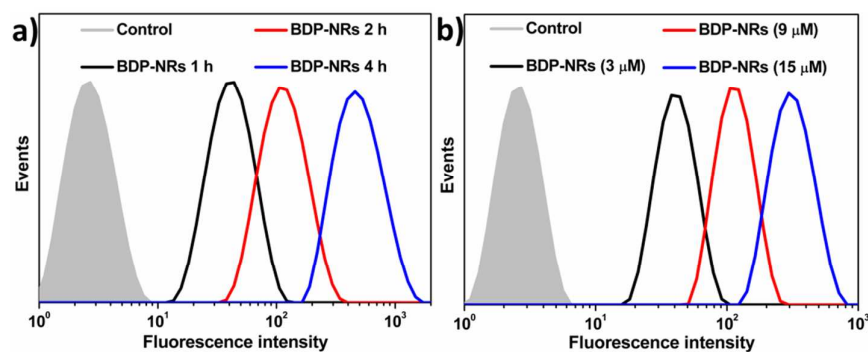

**Figure S10.** a) Flow cytometry analysis of the cellular uptake of BDP-NRs with the same concentration of BDP (9  $\mu\text{M}$ ) over different time (1, 2 and 4 h) at 37  $^{\circ}\text{C}$ . b) Flow cytometry analysis of the cellular uptake of BDP-NRs with various concentration of BDP (3, 9 and 15  $\mu\text{M}$ ) over 2 h at 37  $^{\circ}\text{C}$ .

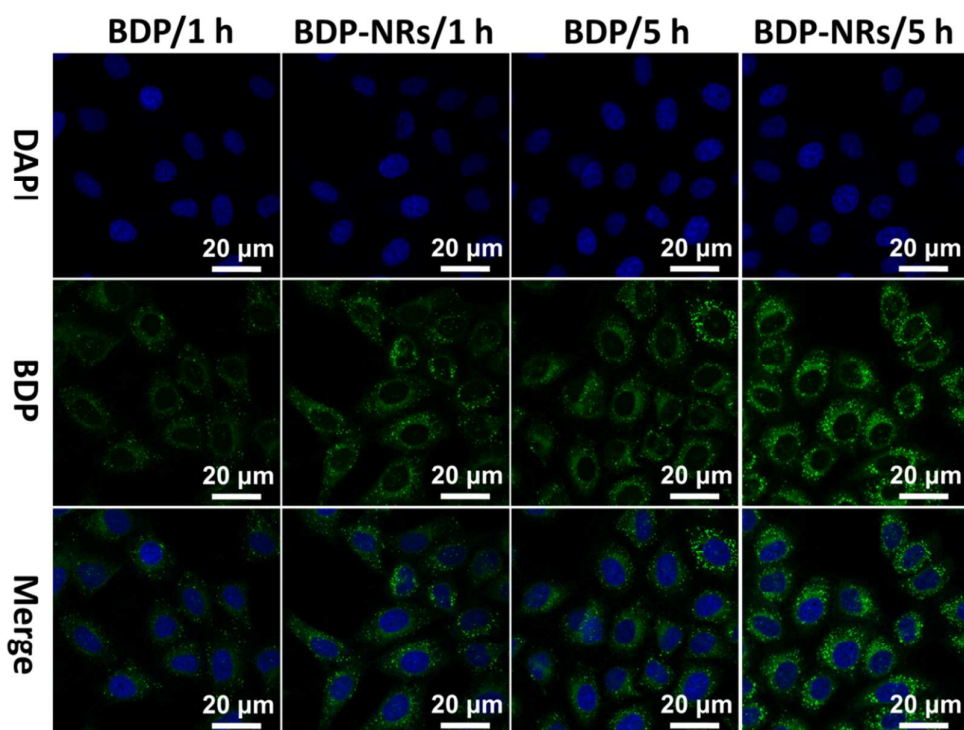

**Figure S11.** CLSM images showing changes in the signal of BDP or BDP-NRs in HeLa cells treated with the same BDP concentration of 9  $\mu\text{M}$  for 1 h and 5 h at 37  $^{\circ}\text{C}$ , respectively. Scale bars: 20  $\mu\text{m}$ .

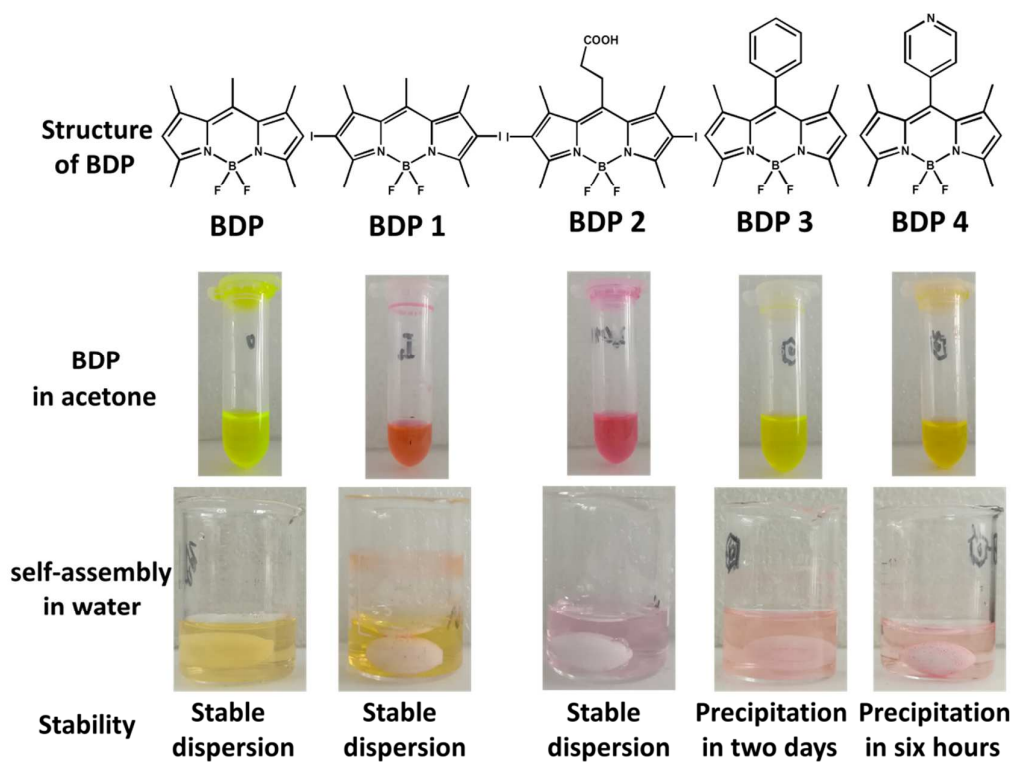

**Figure S12.** Structures of BDP and its derivatives (upper pictures). Photographs of BDP and its derivatives in acetone (middle pictures). Photographs of BDP and its derivatives self-assembly in water (lower pictures), respectively.

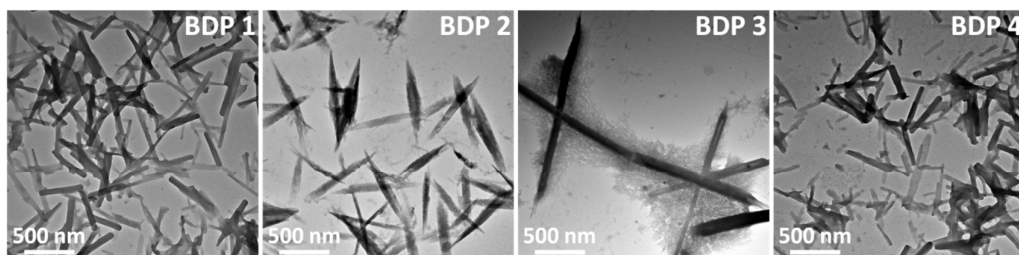

**Figure S13.** The TEM images of BDP derivatives self-assembly in water.

### 3. References

- [1] A. Loudet, K. Burgess, *Chem. Rev.* **2007**, *107*, 4891-4932.
